# Supplementary material for: Short-term and long-term test-retest reliability of memory, complexity, and randomness of EEG microstates sequence
Source: Research Square preprint supplement (doi:10.21203/rs.3.rs-5875634/v1), 2025-08-20
Supplement: Supplementary file 1 [file 056786242468b504fa79c216.docx]

S. Table 1. Descriptive statistics of EEG microstate sequence parameters.

|  |  | Mean | ±SD | Min | Max |
| --- | --- | --- | --- | --- | --- |
| Hurst | S1 | 0.646 | 0.040 | 0.585 | 0.787 |
| S2 | 0.653 | 0.039 | 0.588 | 0.755 |
| S3 | 0.643 | 0.043 | 0.581 | 0.804 |
| nLZC | S1 | 0.154 | 0.006 | 0.138 | 0.164 |
| S2 | 0.153 | 0.007 | 0.132 | 0.163 |
| S3 | 0.152 | 0.008 | 0.132 | 0.163 |
| Microsynt | S1 | 258.775 | 10.763 | 222.260 | 275.073 |
| S2 | 255.916 | 11.343 | 221.095 | 272.769 |
| S3 | 257.455 | 12.331 | 216.146 | 274.146 |
| Entropy | S1 | 2.097 | 0.148 | 1.545 | 2.282 |
| S2 | 2.063 | 0.164 | 1.465 | 2.275 |
| S3 | 2.053 | 0.189 | 1.333 | 2.292 |
| Entropy rate | S1 | 0.417 | 0.040 | 0.286 | 0.475 |
| S2 | 0.406 | 0.042 | 0.279 | 0.465 |
| S3 | 0.411 | 0.046 | 0.260 | 0.482 |

S. Table 2 Descriptive statistics of EEG microstate parameters for spatiotemporal parameters.

|  | |  |  | Mean | | | ±SD | | | Min | | | Max | | |  | | Mean | ±SD | Min | Max |
| --- | --- | --- | --- | --- | --- | --- | --- | --- | --- | --- | --- | --- | --- | --- | --- | --- | --- | --- | --- | --- | --- |
| MS A | S1 | | **GEV (%)** | 8.01 | | 3.43 | | | 2.33 | | | 19.09 | | | **Duration (ms)** | | 62.32 | | 4.72 | 53.09 | 73.65 |
| S2 | | 8.50 | | 3.61 | | | 2.21 | | | 18.61 | | | 63.18 | | 5.22 | 52.69 | 76.25 |
| S3 | | 9.93 | | 4.07 | | | 1.85 | | | 19.28 | | | 63.67 | | 4.50 | 52.12 | 74.50 |
| MS B | S1 | | 9.88 | | 3.35 | | | 1.92 | | | 18.66 | | | 63.46 | | 4.36 | 55.53 | 78.46 |
| S2 | | 9.98 | | 3.34 | | | 1.86 | | | 16.64 | | | 63.68 | | 4.90 | 53.51 | 74.97 |
| S3 | | 8.87 | | 3.72 | | | 1.43 | | | 15.75 | | | 62.12 | | 3.64 | 55.79 | 71.28 |
| MS C | S1 | | 36.54 | | 9.69 | | | 20.49 | | | 63.41 | | | 86.59 | | 15.16 | 64.8 | 143.46 |
| S2 | | 37.33 | | 9.41 | | | 22.27 | | | 64.39 | | | 90.08 | | 16.41 | 65.78 | 153.94 |
| S3 | | 35.27 | | 11.20 | | | 17.87 | | | 67.13 | | | 87.91 | | 18.08 | 68.46 | 154.43 |
| MS D | S1 | | 5.80 | | 4.04 | | | 1.04 | | | 17.16 | | | 59.62 | | 6.07 | 49.78 | 73.97 |
| S2 | | 5.92 | | 4.15 | | | 0.74 | | | 20.75 | | | 60.31 | | 6.60 | 49.45 | 83.50 |
| S3 | | 5.61 | | 3.68 | | | 0.62 | | | 17.83 | | | 59.00 | | 5.87 | 48.61 | 78.65 |
| MS E | S1 | | 4.66 | | 2.20 | | | 1.29 | | | 12.34 | | | 57.60 | | 4.85 | 50.34 | 72.24 |
| S2 | | 3.72 | | 1.84 | | | 0.71 | | | 8.80 | | | 57.15 | | 4.76 | 47.94 | 63.89 |
| S3 | | 3.25 | | 3.16 | | | 0.63 | | | 24.62 | | | 55.14 | | 3.38 | 48.62 | 63.89 |
|  | |  |  | **Mean** | **±SD** | | | **Min** | | | **Max** | | |  | | | | **Mean** | **±SD** | **Min** | **Max** |
| MS A | S1 | | **Time coverage (%)** | 17.26 | | 5.64 | | | 6.48 | | | 31.23 | | | **Occurrence (Hz)** | | 2.35 | | 0.62 | 1.06 | 3.70 |
| S2 | | 17.67 | | 5.83 | | | 5.69 | | | 32.86 | | | 2.35 | | 0.52 | 0.94 | 3.64 |
| S3 | | 19.64 | | 5.84 | | | 5.25 | | | 32.74 | | | 2.61 | | 0.64 | 0.89 | 3.87 |
| MS B | S1 | | 18.87 | | 4.82 | | | 5.38 | | | 30.60 | | | 2.53 | | 0.53 | 0.86 | 3.57 |
| S2 | | 18.02 | | 4.83 | | | 5.44 | | | 23.82 | | | 2.40 | | 0.56 | 0.85 | 3.42 |
| S3 | | 17.68 | | 5.14 | | | 4.95 | | | 25.27 | | | 2.43 | | 0.60 | 0.77 | 3.26 |
| MS C | S1 | | 40.20 | | 9.60 | | | 24.09 | | | 68.94 | | | 3.55 | | 0.38 | 2.72 | 4.42 |
| S2 | | 42.23 | | 9.66 | | | 26.68 | | | 71.66 | | | 3.54 | | 0.40 | 2.70 | 4.48 |
| S3 | | 41.92 | | 11.17 | | | 26.19 | | | 74.80 | | | 3.62 | | 0.39 | 2.46 | 4.48 |
| MS D | S1 | | 12.89 | | 6.41 | | | 4.10 | | | 32.58 | | | 1.82 | | 0.68 | 0.56 | 3.56 |
| S2 | | 12.54 | | 6.34 | | | 2.13 | | | 37.32 | | | 1.74 | | 0.63 | 0.35 | 3.42 |
| S3 | | 12.32 | | 5.78 | | | 3.33 | | | 30.53 | | | 1.76 | | 0.61 | 0.64 | 3.37 |
| MS E | S1 | | 10.79 | | 3.56 | | | 4.35 | | | 23.46 | | | 1.62 | | 0.39 | 0.77 | 2.59 |
| S2 | | 9.55 | | 3.40 | | | 2.77 | | | 20.52 | | | 1.47 | | 0.42 | 0.53 | 2.73 |
| S3 | | 8.45 | | 2.80 | | | 3.00 | | | 14.22 | | | 1.35 | | 0.39 | 0.53 | 2.25 |

S. Table 3. ICC point estimate values with lower and upper 95% CI for spatiotemporal parameters.

| Poor  (ICC=0 – 0.49) | | | Moderate  (ICC=0.5 – 0.74) | | Good  (ICC =0.75-0.89) | | | | Excellent  (ICC=0.9-1) | |
| --- | --- | --- | --- | --- | --- | --- | --- | --- | --- | --- |
|  | **Short-term** | | | | | **Long-term** | | | | |
|  | **Point estimate** | **Lower 95% CI** | | **Upper 95% CI** | | | **Point estimate** | **Lower 95% CI** | | **Upper 95% CI** |
|  | **GEV (%)** | | | | | | | | | |
| MS A | 0.845 | 0.754 | | 0.905 | | | 0.698 | 0.541 | | 0.808 |
| MS B | 0.873 | 0.796 | | 0.922 | | | 0.652 | 0.479 | | 0.777 |
| MS C | 0.894 | 0.829 | | 0.935 | | | 0.710 | 0.558 | | 0.816 |
| MS D | 0.937 | 0.896 | | 0.962 | | | 0.780 | 0.657 | | 0.863 |
| MS E | 0.889 | 0.820 | | 0.932 | | | 0.508 | 0.294 | | 0.674 |
|  | **Duration (ms)** | | | | | | | | | |
| MS A | 0.825 | 0.723 | | 0.891 | | | 0.699 | 0.543 | | 0.809 |
| MS B | 0.767 | 0.638 | | 0.854 | | | 0.587 | 0.393 | | 0.731 |
| MS C | 0.893 | 0.828 | | 0.935 | | | 0.779 | 0.656 | | 0.862 |
| MS D | 0.840 | 0.746 | | 0.901 | | | 0.724 | 0.577 | | 0.825 |
| MS E | 0.839 | 0.745 | | 0.901 | | | 0.432 | 0.201 | | 0.617 |
|  | **Time coverage %** | | | | | | | | | |
| MS A | 0.718 | 0.569 | | 0.822 | | | 0.732 | 0.589 | | 0.831 |
| MS B | 0.886 | 0.816 | | 0.930 | | | 0.728 | 0.583 | | 0.828 |
| MS C | 0.894 | 0.829 | | 0.935 | | | 0.774 | 0.648 | | 0.858 |
| MS D | 0.931 | 0.887 | | 0.958 | | | 0.811 | 0.703 | | 0.883 |
| MS E | 0.890 | 0.822 | | 0.933 | | | 0.474 | 0.252 | | 0.649 |
|  | **Occurrence rate** | | | | | | | | | |
| MS A | 0.904 | 0.844 | | 0.941 | | | 0.718 | 0.569 | | 0.822 |
| MS B | 0.890 | 0.822 | | 0.933 | | | 0.759 | 0.626 | | 0.848 |
| MS C | 0.843 | 0.750 | | 0.903 | | | 0.693 | 0.534 | | 0.805 |
| MS D | 0.932 | 0.889 | | 0.959 | | | 0.823 | 0.720 | | 0.890 |
| MS E | 0.865 | 0.784 | | 0.917 | | | 0.495 | 0.278 | | 0.664 |

S. Table 4. Short-term and long-term ICC values for microstate syntax.

| Poor (ICC=0 – 0.49) | | Moderate (ICC=0.5 – 0.74) | | | Good (ICC =0.75-0.89) | | | Excellent (ICC=0.9-1) | |
| --- | --- | --- | --- | --- | --- | --- | --- | --- | --- |
|  | **Short-term** | | | | | **Long-term** | | | |
|  | **Point estimate** | | **Lower 95% CI** | **Upper 95% CI** | | **Point estimate** | **Lower 95% CI** | | **Upper 95% CI** |
| A → B | 0.526 | | 0.316 | 0.687 | | 0.340 | 0.096 | | 0.545 |
| A → C | 0.725 | | 0.578 | 0.826 | | 0.561 | 0.360 | | 0.713 |
| A → D | 0.253 | | 0 | 0.474 | | 0.134 | -0.122 | | 0.373 |
| A → E | 0.651 | | 0.478 | 0.776 | | 0.593 | 0.400 | | 0.735 |
| B → A | 0.638 | | 0.460 | 0.767 | | 0.539 | 0.332 | | 0.697 |
| B → C | 0.765 | | 0.635 | 0.853 | | 0.563 | 0.362 | | 0.714 |
| B → D | 0.483 | | 0.263 | 0.655 | | 0.375 | 0.135 | | 0.573 |
| B → E | 0.515 | | 0.302 | 0.679 | | 0.400 | 0.164 | | 0.592 |
| C → A | 0.829 | | 0.729 | 0.894 | | 0.590 | 0.397 | | 0.733 |
| C → B | 0.770 | | 0.643 | 0.856 | | 0.468 | 0.245 | | 0.644 |
| C → D | 0.883 | | 0.812 | 0.929 | | 0.733 | 0.590 | | 0.832 |
| C → E | 0.813 | | 0.705 | 0.884 | | 0.394 | 0.158 | | 0.588 |
| D → A | 0.320 | | 0.074 | 0.529 | | 0.378 | 0.139 | | 0.575 |
| D → B | 0.454 | | 0.228 | 0.633 | | 0.083 | -0.173 | | 0.328 |
| D → C | 0.557 | | 0.354 | 0.709 | | 0.394 | 0.158 | | 0.588 |
| D → E | 0.412 | | 0.178 | 0.601 | | 0.194 | -0.061 | | 0.425 |
| E → A | 0.548 | | 0.343 | 0.703 | | 0.484 | 0.264 | | 0.656 |
| E → B | 0.529 | | 0.320 | 0.689 | | 0.341 | 0.097 | | 0.546 |
| E → C | 0.749 | | 0.613 | 0.842 | | 0.671 | 0.505 | | 0.790 |
| E → D | 0.580 | | 0.384 | 0.726 | | 0.537 | 0.330 | | 0.695 |
